# Supplementary material
Source: publisher site journal article supplement (https://www.spandidos-publications.com/5433/downloadSupplementary)

Figure S1. Endoscopic ultrasound-guided fine needle aspiration image.

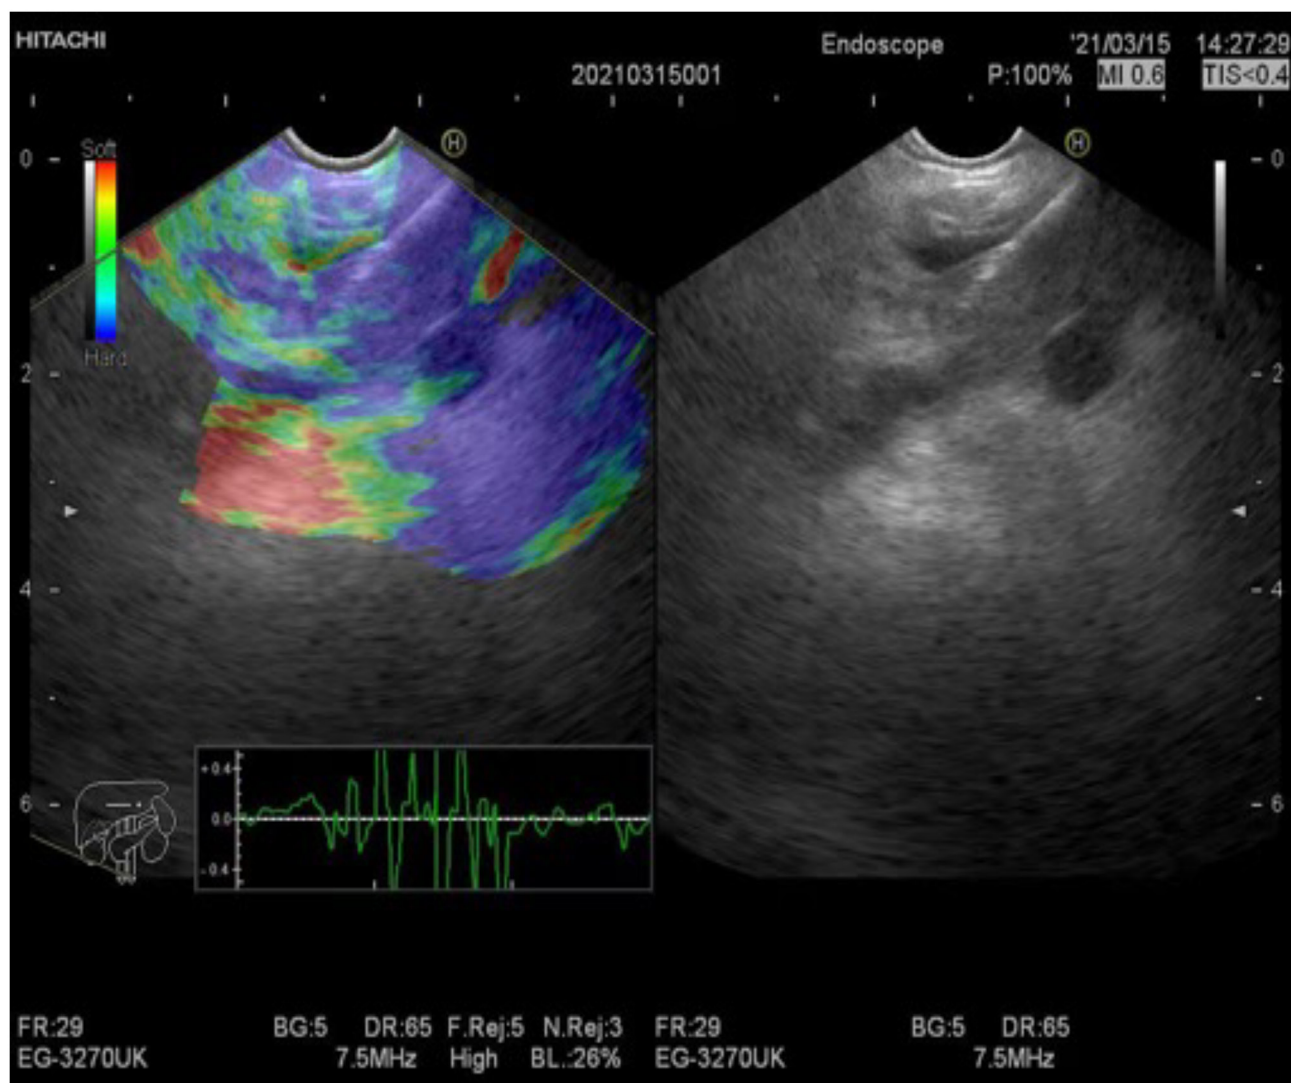

Figure S2. Histopathology of the endoscopic ultrasound-guided fine needle aspiration sample in a patient with pancreatic cancer (H&E; magnification, x200).

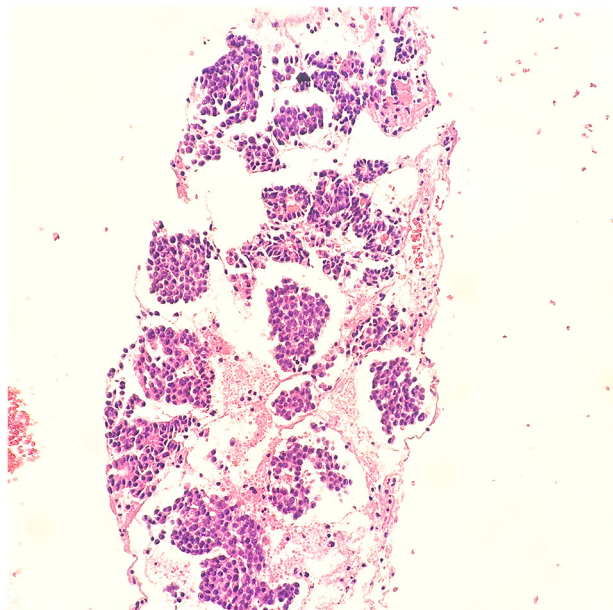

Supplement: Supplementary file 1 [file downloadSupplementary]
